# Supplementary material for: Efficient photocurrent generation by SnO2electrode modified electrophoretically with composite clusters of porphyrin-modified silica microparticle and fullerene
Source: Royal Society of Chemistry journal article supplement (doi:10.1039/b513707a), 2005-12-05

## Efficient photocurrent generation by SnO<sub>2</sub> electrode modified electrophoretically with composite clusters of porphyrin-modified silica microparticle and fullerene

Hiroshi Imahori,<sup>\*a,b</sup> Keigo Mitamura,<sup>a</sup> Tomokazu Umeyama,<sup>a</sup> Kohei Hosomizu,<sup>a</sup> Yoshihiro Matano,<sup>a</sup> Kaname Yoshida,<sup>c</sup> and Seiji Isoda<sup>c</sup>

<sup>a</sup> Department of Molecular Engineering, Graduate School of Engineering, Kyoto University, Nishikyo-ku, Kyoto 615-8510, Japan. Fax: 81-75-383-2571; E-mail: imahori@scl.kyoto-u.ac.jp

<sup>b</sup> Fukui Institute for Fundamental Chemistry, Kyoto University, 34-4, Takano-Nishihiraki-cho, Sakyo-ku, Kyoto 606-8103, Japan

<sup>c</sup> Institute for Chemical Research, Kyoto University, Uji, Kyoto 611-0011, Japan

Optical microscopic images of **2** (a) and **3** (b) measured by using VHX-200 (Keyence) (S1):

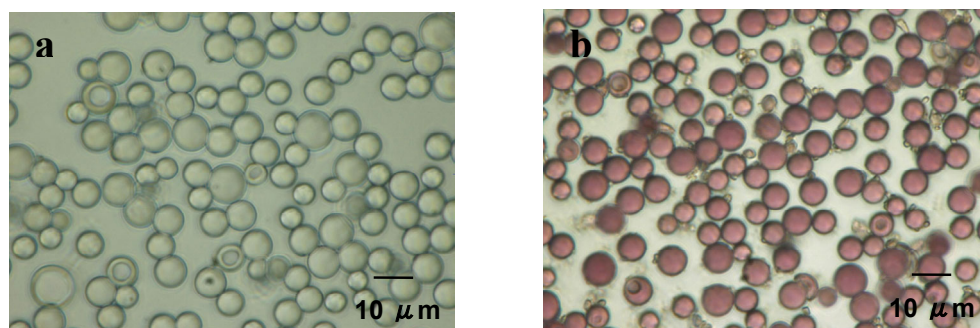

IR spectra of **2** (a), **3** (b), and **4** (c) (1500-1700 cm<sup>-1</sup>) measured in KBr pellet (The spectrum of **3** in the wavenumber of 1700-1575 cm<sup>-1</sup> also shows fitted component peaks at 1670, 1642, 1594 cm<sup>-1</sup> which are assigned to -CONH, -NH<sub>2</sub>, and phenyl groups.) (S2):

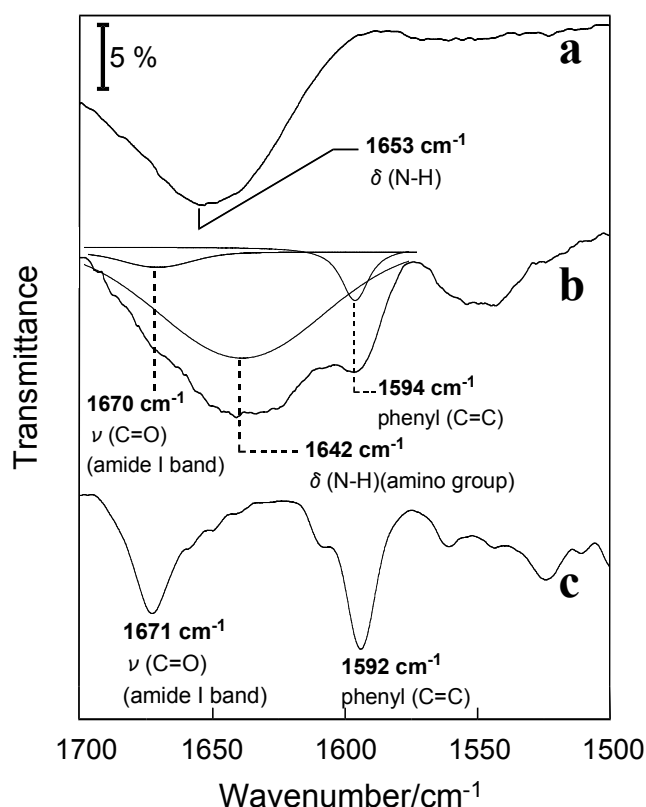

Diffuse reflectance absorption spectrum of **3** (a) and absorption spectrum of **4** ( $2.55 \times 10^{-6}$  M) in  $\text{CHCl}_3$  (b) (The spectrum of **3** is normalized at the Soret band for comparison.) (S3):

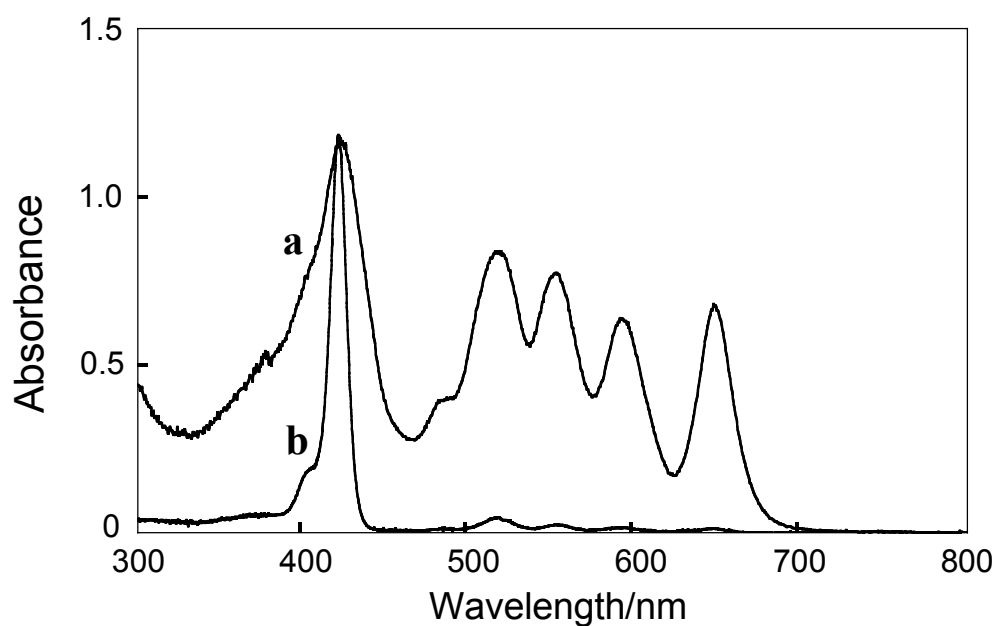

Absorption spectra of  $\text{ITO/SnO}_2/(\mathbf{3}+\text{C}_{60})_{\text{m}}$  ( $[\text{C}_{60}] = 0$  mM (a), 0.17 mM (b), 0.33 mM (c), 0.50 mM (d) in acetonitrile/toluene=2/1;  $[\text{H}_2\text{P}] = 0.17$  mM) (The experimental error is within 5%) (S4):

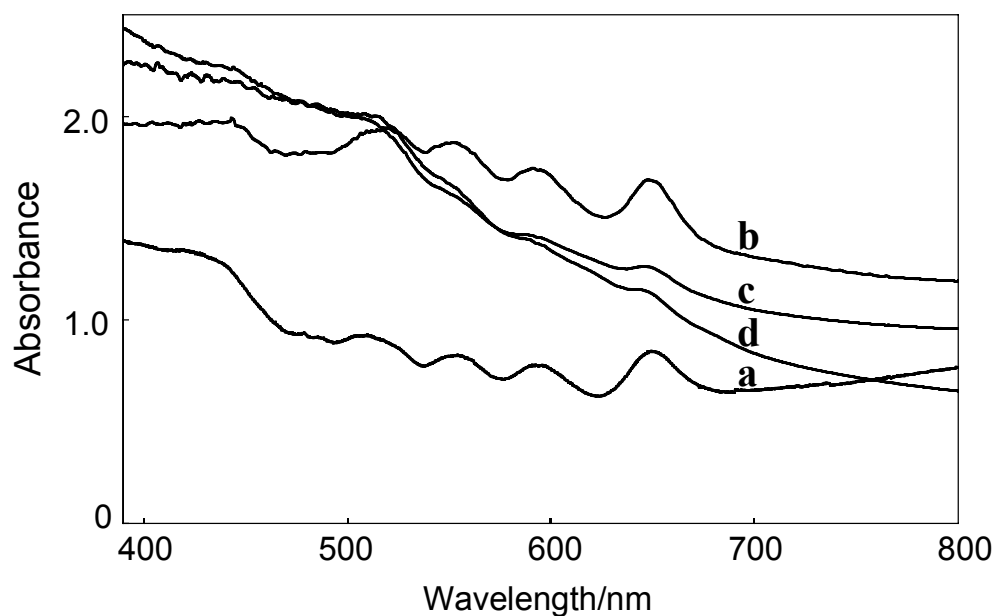

SEM images of ITO/SnO<sub>2</sub>/(**3**+C<sub>60</sub>)<sub>m</sub> ([C<sub>60</sub>]= 0 mM (a) and [C<sub>60</sub>]= 0.50 mM (b) in acetonitrile/toluene=2/1; [H<sub>2</sub>P]=0.17 mM) (S5):

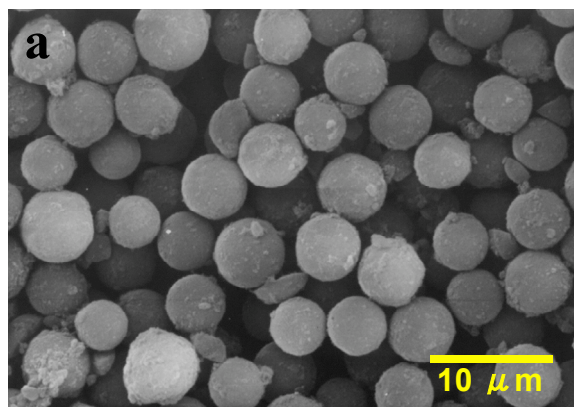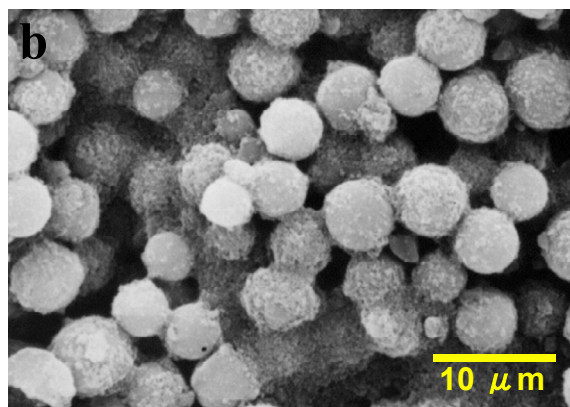

Supplement: b513707a.pdf [file b513707a.pdf]
